# Supplementary material for: Rapid quantification of thiocyanate in milk samples using a universal paper-based SERS sensor
Source: Royal Society of Chemistry journal article supplement (doi:10.1039/d2an01198k), 2022-01-01
Supplement: d2an01198k1.pdf [file d2an01198k1.pdf]

## Rapid quantification of thiocyanate in milk samples using a universal paper-based SERS sensor

Zhejun Yang<sup>a</sup>, Ren Zhang<sup>a</sup>, Hui Chen<sup>a\*</sup>, Jilie Kong<sup>a\*</sup>

<sup>a</sup> Department of Chemistry, Fudan University, Shanghai 200433, China

\* Corresponding author: Department of Chemistry, Fudan University, Shanghai 200433, China. Tel: 86-21-31242138.

Email address: chenhui@fudan.edu.cn, jlkong@fudan.edu.cn

### Supplemental Information

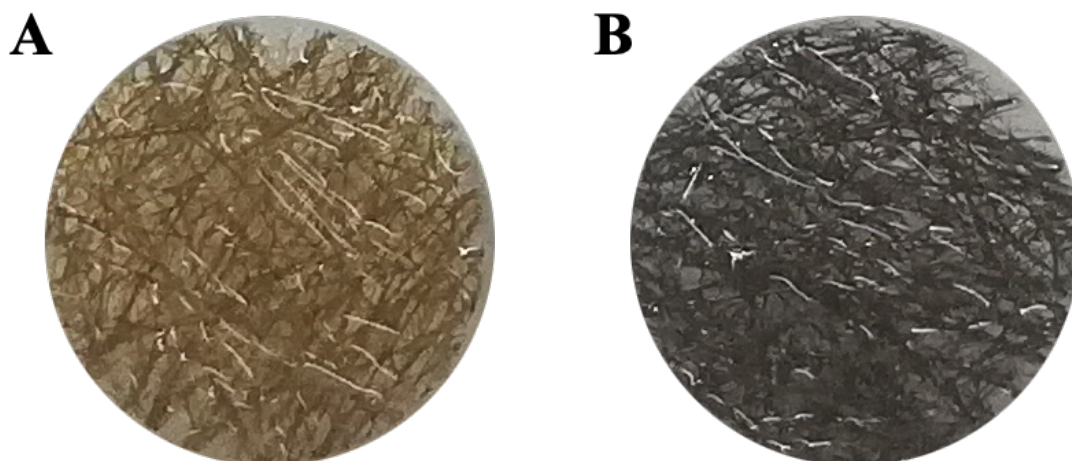

**Figure S1** Pictures of paper substrates deposited with AgNPs after (A) the first NaBH<sub>4</sub> reducing procedure and (B) the second ASC reducing procedure.

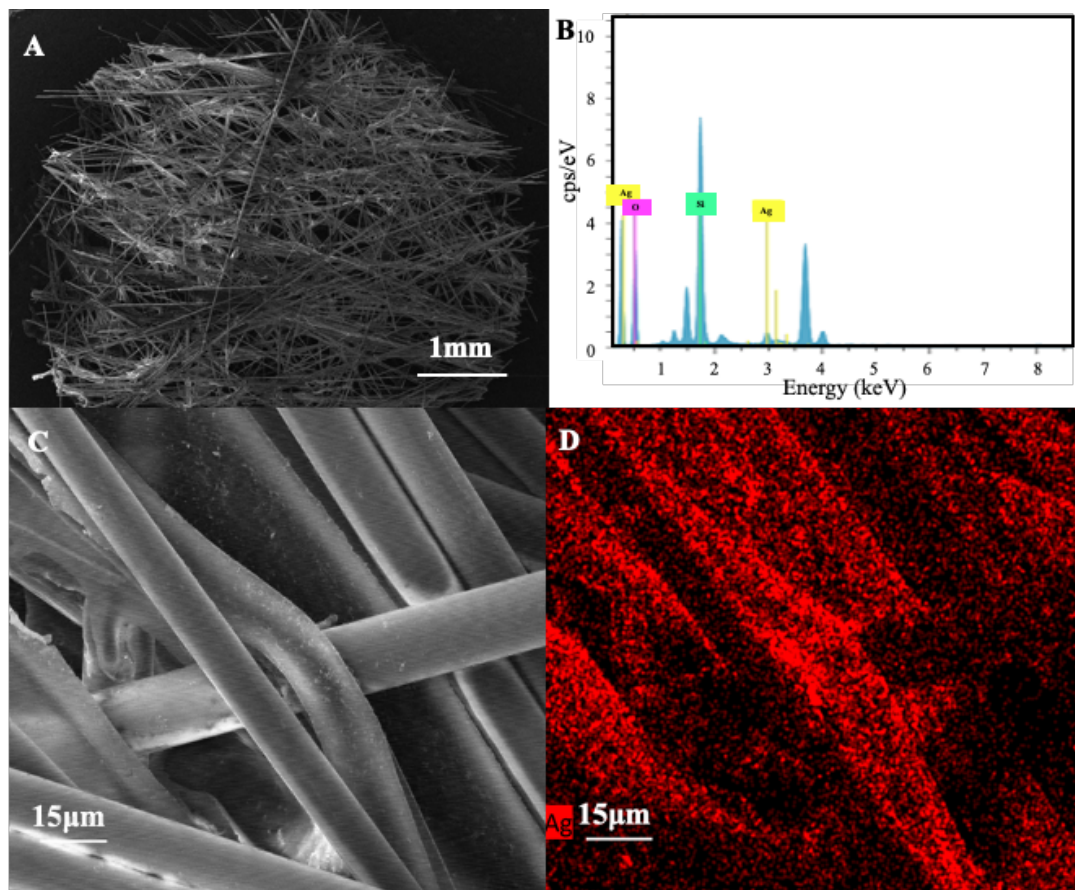

Figure S2 (A) The SEM image of the paper-based SERS sensor. (B) The element results of the SEM image of the paper-based SERS sensor. (C) Corresponding SEM image with high magnification (D) EDS mapping result of AgNPs loaded on paper fibers.
